# Supplementary material for: Evaluation of Nanocomposite Made of Polylactic Acid and Nanocellulose from Carrot Pomace Modified with Silver Nanoparticles
Source: PubMed Central journal article supplement (PMC7240409; doi:10.3390/polym12040812), 2020-04-04
Supplement: polymers-12-00812-s001.pdf [file polymers-12-00812-s001.pdf]

# Evaluation of Nanocomposite Made of Polylactic Acid and Nanocellulose from Carrot Pomace Modified with Silver Nanoparticles

Monika Szymańska-Chargot, Monika Chylińska, Piotr Pieczywek, Anna Walkiewicz, Giorgia Pertile, Magdalena Frać, Krystian J. Cieślak and Artur Zdunek

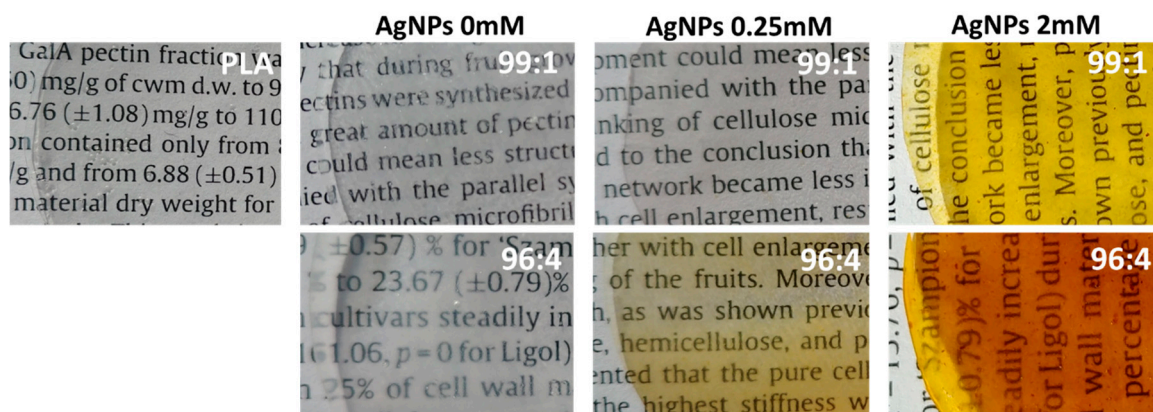

**Figure S1.** Photo of PLA and nanocellulose modified with silver nanoparticles composites. The ratio PLA:CCNF is marked on the pictures.

**Table S1.** The pre-culturing conditions for tested bacterial strains.

| Microorganisms                    | Type/Family   | Reference   | Isolation Source | Accession Number | Medium              | Temperature |
|-----------------------------------|---------------|-------------|------------------|------------------|---------------------|-------------|
| <i>Bacillus cereus</i>            | Gram-positive | LMEM B35/13 | Waste digested   | KJ531940 (NCBI)  | Nutrient Broth/Agar | 37 °C       |
| <i>Escherichia coli</i>           | Gram-negative | LMEM B4/164 | Soil             | MH176160 (NCBI)  | Eijkman Broth/Agar  | 37 °C       |
| <i>Staphylococcus epidermidis</i> | Gram-positive | LMEM B49/11 | Organic waste    | KJ020348 (NCBI)  | Nutrient Broth/Agar | 37 °C       |

LMEM - Laboratory of Molecular and Environmental Microbiology, Institute of Agrophysics, Polish Academy of Sciences.
